# Supplementary material for: Does the relative importance of the OxCAP-MH’s capability items differ according to mental ill-health experience?
Source: Research Square preprint supplement (doi:10.21203/rs.3.rs-1411909/v1), 2022-03-02
Supplement: Supplementary file 1 [file d5755c3e3546fd256d8b2a20.pdf]

## Appendix 1: List of OxCAP-MH items, questions and attributes included in the BWS task

| Item | OxCAP-MH abbreviation                          | OxCAP-MH question                                                                                                                 | Attribute in the BWS task                                                                                     |
|------|------------------------------------------------|-----------------------------------------------------------------------------------------------------------------------------------|---------------------------------------------------------------------------------------------------------------|
| 1    | Limitation in daily activities                 | Does your health in any way limit your daily activities, compared to most people of your age?                                     | My health does not limit my daily activities in any way compared to most people of my age.                    |
| 2    | Social networks                                | Are you able to meet socially with friends or relatives?                                                                          | I am able to meet socially with friends or relatives.                                                         |
| 3    | Losing sleep over worry                        | In the past 4 weeks, how often have you lost sleep over worry?                                                                    | I do not lose sleep over worry.                                                                               |
| 4    | Enjoying social and recreational activities    | In the past 4 weeks, how often have you been able to enjoy your recreational activities?                                          | I am able to enjoy my recreational activities.                                                                |
| 5    | Having suitable accommodation                  | How suitable or unsuitable is your accommodation for your current needs?                                                          | My accommodation is suitable for my needs.                                                                    |
| 6    | Feeling safe                                   | Please indicate how safe you feel walking alone in the area near your home:                                                       | I feel safe walking alone in the area near my home.                                                           |
| 7    | Likelihood of assault                          | Please indicate how likely you believe it to be that you will be assaulted in the future (including sexual and domestic assault): | I am not assaulted (including sexual and domestic assault).                                                   |
| 8    | Likelihood of discrimination                   | How likely do you think it is that you will experience discrimination?                                                            | I do not experience discrimination.                                                                           |
| [8a] |                                                | <i>[On what grounds do you think it is likely that you will be discriminated against?]</i>                                        |                                                                                                               |
| 9a   | Influencing local decisions                    | I am free to influence decisions affecting my local area.                                                                         | I am able to influence decision affecting my local area.                                                      |
| 9b   | Freedom of expression                          | I am free to express my views, including political and religious views.                                                           | I am free to express my views, including political and religious views.                                       |
| 9c   | Appreciating nature                            | I am able to appreciate and value plants, animals and the world of nature.                                                        | I am able to appreciate and value plants, animals and the world of nature.                                    |
| 9d   | Respecting and valuing people                  | I am able to respect, value and appreciate people around me                                                                       | I am able to respect, value and appreciate people around me.                                                  |
| 9e   | Enjoying friendship and support                | I find it easy to enjoy the love, care and support of my family and/or friends.                                                   | I find it easy to enjoy the love, care and support of my family and/or friends.                               |
| 9f   | Self-determination                             | I am free to decide for myself how to live my life.                                                                               | I am free to decide for myself how to live my life.                                                           |
| 9g   | Imagination and creativity                     | I am able to use my imagination and to express myself creatively (e.g. through art, literature, music, etc.).                     | I am free to use my imagination and to express myself creatively (e.g. through art, literature, music, etc.). |
| 9h   | Access to interesting activities or employment | I have access to interesting forms of activity (or employment).                                                                   | I have access to interesting forms of activity (or employment).                                               |

**Appendix 2: Mean Relative Importance Scores and Standard Deviations of OxCAP-MH domains calculated by Hierarchical Bayes estimation**

| Domain | Question Number | Label                                          | Full cohort (n=158) | GP patients (n=50) | Psychiatric patients (n=53) | Mental health experts (n=55) |
|--------|-----------------|------------------------------------------------|---------------------|--------------------|-----------------------------|------------------------------|
|        |                 |                                                | Mean (SD)           | Mean (SD)          | Mean (SD)                   | Mean (SD)                    |
| 1      | 1               | Limitation in daily activities                 | 10.48 (7.43)        | 11.99 (7.72)       | 9.44 (7.75)                 | 10.11 (6.74)                 |
| 2      | 2               | Social networks                                | 5.89 (5.14)         | 4.59 (4.24)        | 6.72 (5.71)                 | 6.26 (5.16)                  |
| 3      | 3               | Losing sleep over worry                        | 2.48 (3.84)         | 3.08 (4.26)        | 2.36 (3.64)                 | 2.06 (3.62)                  |
| 4      | 4               | Enjoying social and recreational activities    | 3.73 (4.78)         | 3.09 (4.20)        | 4.81 (5.17)                 | 3.28 (4.78)                  |
| 5      | 5               | Having suitable accommodation                  | 3.85 (5.04)         | 3.68 (4.48)        | 5.96 (6.38)                 | 1.98 (2.90)                  |
| 6      | 6               | Feeling safe                                   | 4.41 (4.97)         | 5.07 (5.17)        | 3.04 (4.47)                 | 5.11 (5.05)                  |
| 7      | 7               | Likelihood of assault                          | 9.92 (6.71)         | 10.00 (6.47)       | 8.04 (6.25)                 | 11.67 (6.97)                 |
| 8      | 8               | Likelihood of discrimination                   | 8.71 (6.65)         | 9.02 (6.46)        | 7.21 (6.21)                 | 9.87 (7.06)                  |
| 9      | 9a              | Influencing local decisions                    | 0.76 (1.92)         | 0.64 (1.12)        | 0.75 (1.38)                 | 0.88 (2.77)                  |
| 10     | 9b              | Freedom of expression                          | 6.76 (5.75)         | 7.90 (6.07)        | 4.64 (4.59)                 | 7.77 (5.97)                  |
| 11     | 9c              | Appreciating nature                            | 3.22 (4.13)         | 3.50 (4.34)        | 3.80 (4.62)                 | 2.38 (3.30)                  |
| 12     | 9d              | Respecting and valuing people                  | 6.89 (5.58)         | 6.54 (5.49)        | 7.15 (5.86)                 | 6.95 (5.49)                  |
| 13     | 9e              | Enjoying friendship and support                | 9.02 (6.10)         | 8.38 (5.84)        | 9.40 (6.09)                 | 9.24 (6.39)                  |
| 14     | 9f              | Self-determination                             | 15.72 (4.74)        | 15.80 (4.68)       | 16.25 (4.85)                | 15.15 (4.72)                 |
| 15     | 9g              | Imagination and creativity                     | 3.47 (5.34)         | 3.71 (5.57)        | 4.69 (6.09)                 | 2.08 (3.94)                  |
| 16     | 9h              | Access to interesting activities or employment | 4.70 (5.03)         | 3.01 (4.05)        | 5.74 (5.56)                 | 5.22 (4.99)                  |

## Appendix 3: Sample BWS questionnaire

Studie zur Gewichtung von Domänen  
des OxCAP-MH-Fragebogens

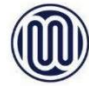

CENTER FOR PUBLIC HEALTH  
MEDICAL UNIVERSITY OF VIENNA  
Department of Health Economics

### BWS Fragebogen für psychiatrische Patienten (Version 1)

#### Studie zur Gewichtung von Domänen des OxCAP-MH-Fragebogens

Sehr geehrte Teilnehmerin, sehr geehrter Teilnehmer!

Wir laden Sie ein, an der oben genannten Studie teilzunehmen.

Zur Messung der Lebensqualität von Personen mit psychischen Erkrankungen wurde ein Fragebogen (abgekürzt OxCAP-MH) entwickelt, der auf 16 Domänen (Fragen) basiert. Bislang gingen alle 16 Domänen mit gleicher Gewichtung in die Gesamtbewertung der Lebensqualität ein. Es gibt jedoch Hinweise aus der Literatur, dass einige Domänen bei der Bestimmung des Wohlbefindens und der Lebensqualität einer Person möglicherweise relevanter sind als andere. Es ist daher wichtig zu erheben, welchen Beitrag die einzelnen Domänen zur Gesamtbewertung leisten. Das Hauptziel dieser Studie ist es, zu bestimmen, welche relativen Gewichte den 16 Domänen des OxCAP-MH zugeordnet werden können.

Insgesamt möchten wir 100 Patienten in psychiatrischer Behandlung bitten, den Fragebogen auszufüllen. Der Fragebogen enthält Fragen zu Ihren demografischen Daten (8 Fragen) und Präferenzen (16 Fragen). Konkret decken die Fragen ab, welche Domänen der Lebensqualität für Sie am wichtigsten und am unwichtigsten sind. Hierbei wählen Sie bitte die beste und die schlechteste Option. Es werden keine körperlichen Untersuchungen vorgenommen.

Ihre Teilnahme an dieser Befragung wird rund 20 Minuten dauern.

**Sie füllen den Fragebogen selbstständig aus und ihre Daten sind völlig anonymisiert.**

**Ihre Teilnahme an dieser Befragung erfolgt freiwillig. Sie können jederzeit ohne Angabe von Gründen aus der Studie ausscheiden. Die Ablehnung der Teilnahme oder ein vorzeitiges Ausscheiden hat keinerlei nachteilige Folgen für Sie.**

Für weitere Fragen im Zusammenhang mit dieser Befragung steht Ihnen die Studienmitarbeiterin gerne zur Verfügung. Auch Fragen, die Ihre Rechte als Teilnehmer oder Teilnehmerin an dieser Befragung betreffen, werden Ihnen gerne beantwortet.

Name der Mitarbeiterin: Mag. Timea Helter

Durchgehend erreichbar unter: 0676-7158919

Name und Kontaktdaten des verantwortlichen Prüfarzts:

Univ.-Prof. Dr. Johannes Wancata  
Leiter der Klinischen Abteilung für Sozialpsychiatrie  
Universitätsklinik für Psychiatrie und Psychotherapie  
Allgemeines Krankenhaus der Stadt Wien  
Währinger Gürtel 18-20  
1090 Wien

Telefon: 01-40400-36030

E-Mail: sozial-psychiatry@meduniwien.ac.at

Ich bin **damit** einverstanden, an dieser Studie teilzunehmen. ☐

Ich bin **nicht** einverstanden, an dieser Studie teilzunehmen. ☐

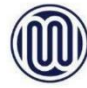

Wie alt sind Sie?

- ☐ 18-24
- ☐ 25-29
- ☐ 30-34
- ☐ 35-39
- ☐ 40-44
- ☐ 45-49
- ☐ 50-54
- ☐ 55-59
- ☐ 60-64
- ☐ 65-69
- ☐ 70-74
- ☐ 75-80

Sind Sie weiblich oder männlich?

- ☐ Weiblich
- ☐ Divers
- ☐ Männlich

Was ist Ihr höchster Bildungsabschluss?

- ☐ Kein Abschluss
- ☐ Hauptschule, Unterstufe AHS, NMS, Sonderschule
- ☐ Matura
- ☐ Derzeit Student an einer Universität oder einer anderen Hochschule
- ☐ Fachhochschule, Universität oder Postgraduiert (Dr)

Wie ist Ihr aktueller Familienstand?

- ☐ Ledig
- ☐ Verheiratet, zusammenlebend, oder in einer eingetragenen Partnerschaft
- ☐ Geschieden oder getrennt
- ☐ Verwitwet

Wie viele Kinder haben Sie?

Wie würden Sie Ihren Wohnort beschreiben?

- ☐ Stadt oder Großstadt (mehr als 100.000 Einwohner)
- ☐ Kleinstadt (weniger als 100.000 Einwohner)
- ☐ Dorf
- ☐ Anderer abgelegener Ort

Leiden Sie unter einer psychischen Erkrankung, und/oder haben Sie in Ihrem Umfeld Erfahrungen mit psychischen Erkrankungen gemacht (z.B. eigene Erkrankung, im Familien- und Freundeskreis, oder Beruf)?

- ☐ Nein
- ☐ Ja, ich leide unter der folgenden psychischen Erkrankung(en):

- ☐ Ja, in meinem Umfeld habe ich die folgenden Erfahrungen mit psychischen Erkrankungen gemacht:

Leiden Sie unter einer körperlichen Erkrankung?

- ☐ Nein
- ☐ Ja, die folgende(n) körperlichen Erkrankung(en):



Stellen Sie sich bitte vor, Sie müssten zwischen den folgenden sechs Optionen wählen, basierend auf den für Sie persönlich wichtigsten und unwichtigsten Aspekten in Ihrem Leben.  
Bitte wählen Sie jeweils die wichtigste bzw. unwichtigste Option.

(1 of 16)

Eine Option als  
"Am Wichtigsten"

Eine Option als  
"Am Unwichtigsten"

| Am Wichtigsten        |                                                                                                                                    | Am Unwichtigsten      |
|-----------------------|------------------------------------------------------------------------------------------------------------------------------------|-----------------------|
| <input type="radio"/> | Mein Gesundheitszustand, verglichen mit gleichaltrigen Menschen, schränkt mich in meinen Alltagsaktivitäten in keinsten Weise ein. | <input type="radio"/> |
| <input type="radio"/> | Ich werde nicht angegriffen (einschließlich sexueller und häuslicher Gewalt).                                                      | <input type="radio"/> |
| <input type="radio"/> | Ich kann Entscheidungen beeinflussen, die sich auf mein Wohngebiet auswirken.                                                      | <input type="radio"/> |
| <input type="radio"/> | Ich kann Pflanzen, Tiere und die Natur würdigen und wertschätzen.                                                                  | <input type="radio"/> |
| <input type="radio"/> | Ich habe Zugang zu interessanten Aktivitäten (oder Erwerbstätigkeit).                                                              | <input type="radio"/> |
| <input type="radio"/> | Ich kann meiner Fantasie freien Lauf lassen und mich kreativ ausdrücken (z.B. durch Kunst, Literatur, Musik, usw.).                | <input type="radio"/> |

Stellen Sie sich bitte vor, Sie müssten zwischen den folgenden sechs Optionen wählen, basierend auf den für Sie persönlich wichtigsten und unwichtigsten Aspekten in Ihrem Leben.  
Bitte wählen Sie jeweils die wichtigste bzw. unwichtigste Option.

(2 of 16)

| Am Wichtigsten        |                                                                                                                                                                                                                                       | Am Unwichtigsten      |
|-----------------------|---------------------------------------------------------------------------------------------------------------------------------------------------------------------------------------------------------------------------------------|-----------------------|
| <input type="radio"/> | Ich werde nicht angegriffen (einschließlich sexueller und häuslicher Gewalt).                                                                                                                                                         | <input type="radio"/> |
| <input type="radio"/> | Mein Gesundheitszustand, verglichen mit gleichaltrigen Menschen, schränkt mich in meinen Alltagsaktivitäten in keinsten Weise ein.                                                                                                    | <input type="radio"/> |
| <input type="radio"/> | Mir fällt es leicht, die Liebe, Fürsorge und Unterstützung meiner Familie und/oder Freunde anzunehmen und zu genießen.                                                                                                                | <input type="radio"/> |
| <input type="radio"/> | Ich werde nicht diskriminiert (aus den folgenden Gründen: Volkszugehörigkeit/ethnische Zugehörigkeit, Geschlecht, Religion, sexuelle Orientierung, Alter, Gesundheitszustand oder Behinderung - einschließlich geistiger Gesundheit). | <input type="radio"/> |
| <input type="radio"/> | Ich kann die Menschen in meiner Umgebung respektieren, wertschätzen und würdigen.                                                                                                                                                     | <input type="radio"/> |
| <input type="radio"/> | Ich schlafe nicht weniger, weil ich mir Sorgen mache.                                                                                                                                                                                 | <input type="radio"/> |

Stellen Sie sich bitte vor, Sie müssten zwischen den folgenden sechs Optionen wählen, basierend auf den für Sie persönlich wichtigsten und unwichtigsten Aspekten in Ihrem Leben.  
Bitte wählen Sie jeweils die wichtigste bzw. unwichtigste Option.

(3 of 16)

| Am Wichtigsten        |                                                                                                                     | Am Unwichtigsten      |
|-----------------------|---------------------------------------------------------------------------------------------------------------------|-----------------------|
| <input type="radio"/> | Ich kann meiner Fantasie freien Lauf lassen und mich kreativ ausdrücken (z.B. durch Kunst, Literatur, Musik, usw.). | <input type="radio"/> |
| <input type="radio"/> | Ich habe Zugang zu interessanten Aktivitäten (oder Erwerbstätigkeit).                                               | <input type="radio"/> |
| <input type="radio"/> | Ich kann die Menschen in meiner Umgebung respektieren, wertschätzen und würdigen.                                   | <input type="radio"/> |
| <input type="radio"/> | Ich kann meine Ansichten frei äußern, auch meine politischen und religiösen Ansichten.                              | <input type="radio"/> |
| <input type="radio"/> | Ich kann meine Freizeitaktivitäten genießen.                                                                        | <input type="radio"/> |
| <input type="radio"/> | Ich fühle mich sicher, wenn ich allein in der Nähe meiner Wohnung zu Fuß unterwegs bin.                             | <input type="radio"/> |

Stellen Sie sich bitte vor, Sie müssten zwischen den folgenden sechs Optionen wählen, basierend auf den für Sie persönlich wichtigsten und unwichtigsten Aspekten in Ihrem Leben.  
Bitte wählen Sie jeweils die wichtigste bzw. unwichtigste Option.

(4 of 16)

| Am Wichtigsten        |                                                                                                                                                                                                                                       | Am Unwichtigsten      |
|-----------------------|---------------------------------------------------------------------------------------------------------------------------------------------------------------------------------------------------------------------------------------|-----------------------|
| <input type="radio"/> | Ich werde nicht diskriminiert (aus den folgenden Gründen: Volkszugehörigkeit/ethnische Zugehörigkeit, Geschlecht, Religion, sexuelle Orientierung, Alter, Gesundheitszustand oder Behinderung - einschließlich geistiger Gesundheit). | <input type="radio"/> |
| <input type="radio"/> | Ich schlafe nicht weniger, weil ich mir Sorgen mache.                                                                                                                                                                                 | <input type="radio"/> |
| <input type="radio"/> | Ich habe Zugang zu interessanten Aktivitäten (oder Erwerbstätigkeit).                                                                                                                                                                 | <input type="radio"/> |
| <input type="radio"/> | Ich fühle mich sicher, wenn ich allein in der Nähe meiner Wohnung zu Fuß unterwegs bin.                                                                                                                                               | <input type="radio"/> |
| <input type="radio"/> | Meine Wohnsituation ist für meine Bedürfnisse geeignet.                                                                                                                                                                               | <input type="radio"/> |
| <input type="radio"/> | Ich kann Freunde oder Verwandte in geselligem Rahmen treffen.                                                                                                                                                                         | <input type="radio"/> |



Stellen Sie sich bitte vor, Sie müssten zwischen den folgenden sechs Optionen wählen, basierend auf den für Sie persönlich wichtigsten und unwichtigsten Aspekten in Ihrem Leben.  
Bitte wählen Sie jeweils die wichtigste bzw. unwichtigste Option.

(5 of 16)

| Am Wichtigsten        |                                                                                                                                    | Am Unwichtigsten      |
|-----------------------|------------------------------------------------------------------------------------------------------------------------------------|-----------------------|
| <input type="radio"/> | Ich schlafe nicht weniger, weil ich mir Sorgen mache.                                                                              | <input type="radio"/> |
| <input type="radio"/> | Ich kann meiner Fantasie freien Lauf lassen und mich kreativ ausdrücken (z.B. durch Kunst, Literatur, Musik, usw.).                | <input type="radio"/> |
| <input type="radio"/> | Mein Gesundheitszustand, verglichen mit gleichaltrigen Menschen, schränkt mich in meinen Alltagsaktivitäten in keinster Weise ein. | <input type="radio"/> |
| <input type="radio"/> | Meine Wohnsituation ist für meine Bedürfnisse geeignet.                                                                            | <input type="radio"/> |
| <input type="radio"/> | Ich kann meine Ansichten frei äußern, auch meine politischen und religiösen Ansichten.                                             | <input type="radio"/> |
| <input type="radio"/> | Ich kann selbst frei entscheiden, wie ich mein Leben lebe.                                                                         | <input type="radio"/> |

Stellen Sie sich bitte vor, Sie müssten zwischen den folgenden sechs Optionen wählen, basierend auf den für Sie persönlich wichtigsten und unwichtigsten Aspekten in Ihrem Leben.  
Bitte wählen Sie jeweils die wichtigste bzw. unwichtigste Option.

(6 of 16)

| Am Wichtigsten        |                                                                                                                                                                                                                                       | Am Unwichtigsten      |
|-----------------------|---------------------------------------------------------------------------------------------------------------------------------------------------------------------------------------------------------------------------------------|-----------------------|
| <input type="radio"/> | Ich kann meine Ansichten frei äußern, auch meine politischen und religiösen Ansichten.                                                                                                                                                | <input type="radio"/> |
| <input type="radio"/> | Mir fällt es leicht, die Liebe, Fürsorge und Unterstützung meiner Familie und/oder Freunde anzunehmen und zu genießen.                                                                                                                | <input type="radio"/> |
| <input type="radio"/> | Ich werde nicht angegriffen (einschließlich sexueller und häuslicher Gewalt).                                                                                                                                                         | <input type="radio"/> |
| <input type="radio"/> | Ich fühle mich sicher, wenn ich allein in der Nähe meiner Wohnung zu Fuß unterwegs bin.                                                                                                                                               | <input type="radio"/> |
| <input type="radio"/> | Ich kann Pflanzen, Tiere und die Natur würdigen und wertschätzen.                                                                                                                                                                     | <input type="radio"/> |
| <input type="radio"/> | Ich werde nicht diskriminiert (aus den folgenden Gründen: Volkszugehörigkeit/ethnische Zugehörigkeit, Geschlecht, Religion, sexuelle Orientierung, Alter, Gesundheitszustand oder Behinderung - einschließlich geistiger Gesundheit). | <input type="radio"/> |



Stellen Sie sich bitte vor, Sie müssten zwischen den folgenden sechs Optionen wählen, basierend auf den für Sie persönlich wichtigsten und unwichtigsten Aspekten in Ihrem Leben.  
Bitte wählen Sie jeweils die wichtigste bzw. unwichtigste Option.

(7 of 16)

| Am Wichtigsten        |                                                                                                                        | Am Unwichtigsten      |
|-----------------------|------------------------------------------------------------------------------------------------------------------------|-----------------------|
| <input type="radio"/> | Ich fühle mich sicher, wenn ich allein in der Nähe meiner Wohnung zu Fuß unterwegs bin.                                | <input type="radio"/> |
| <input type="radio"/> | Ich kann selbst frei entscheiden, wie ich mein Leben lebe.                                                             | <input type="radio"/> |
| <input type="radio"/> | Meine Wohnsituation ist für meine Bedürfnisse geeignet.                                                                | <input type="radio"/> |
| <input type="radio"/> | Mir fällt es leicht, die Liebe, Fürsorge und Unterstützung meiner Familie und/oder Freunde anzunehmen und zu genießen. | <input type="radio"/> |
| <input type="radio"/> | Ich kann die Menschen in meiner Umgebung respektieren, wertschätzen und würdigen.                                      | <input type="radio"/> |
| <input type="radio"/> | Ich habe Zugang zu interessanten Aktivitäten (oder Erwerbstätigkeit).                                                  | <input type="radio"/> |

Stellen Sie sich bitte vor, Sie müssten zwischen den folgenden sechs Optionen wählen, basierend auf den für Sie persönlich wichtigsten und unwichtigsten Aspekten in Ihrem Leben.  
Bitte wählen Sie jeweils die wichtigste bzw. unwichtigste Option.

(8 of 16)

| Am Wichtigsten        |                                                                                                                                                                                                                                       | Am Unwichtigsten      |
|-----------------------|---------------------------------------------------------------------------------------------------------------------------------------------------------------------------------------------------------------------------------------|-----------------------|
| <input type="radio"/> | Meine Wohnsituation ist für meine Bedürfnisse geeignet.                                                                                                                                                                               | <input type="radio"/> |
| <input type="radio"/> | Ich fühle mich sicher, wenn ich allein in der Nähe meiner Wohnung zu Fuß unterwegs bin.                                                                                                                                               | <input type="radio"/> |
| <input type="radio"/> | Ich kann meine Freizeitaktivitäten genießen.                                                                                                                                                                                          | <input type="radio"/> |
| <input type="radio"/> | Ich kann meiner Fantasie freien Lauf lassen und mich kreativ ausdrücken (z.B. durch Kunst, Literatur, Musik, usw.).                                                                                                                   | <input type="radio"/> |
| <input type="radio"/> | Ich werde nicht diskriminiert (aus den folgenden Gründen: Volkszugehörigkeit/ethnische Zugehörigkeit, Geschlecht, Religion, sexuelle Orientierung, Alter, Gesundheitszustand oder Behinderung - einschließlich geistiger Gesundheit). | <input type="radio"/> |
| <input type="radio"/> | Ich kann Pflanzen, Tiere und die Natur würdigen und wertschätzen.                                                                                                                                                                     | <input type="radio"/> |

Stellen Sie sich bitte vor, Sie müssten zwischen den folgenden sechs Optionen wählen, basierend auf den für Sie persönlich wichtigsten und unwichtigsten Aspekten in Ihrem Leben.  
Bitte wählen Sie jeweils die wichtigste bzw. unwichtigste Option.

(9 of 16)

| Am Wichtigsten        |                                                                                                                                    | Am Unwichtigsten      |
|-----------------------|------------------------------------------------------------------------------------------------------------------------------------|-----------------------|
| <input type="radio"/> | Mir fällt es leicht, die Liebe, Fürsorge und Unterstützung meiner Familie und/oder Freunde anzunehmen und zu genießen.             | <input type="radio"/> |
| <input type="radio"/> | Ich kann meine Freizeitaktivitäten genießen.                                                                                       | <input type="radio"/> |
| <input type="radio"/> | Ich kann selbst frei entscheiden, wie ich mein Leben lebe.                                                                         | <input type="radio"/> |
| <input type="radio"/> | Mein Gesundheitszustand, verglichen mit gleichaltrigen Menschen, schränkt mich in meinen Alltagsaktivitäten in keinster Weise ein. | <input type="radio"/> |
| <input type="radio"/> | Ich werde nicht angegriffen (einschließlich sexueller und häuslicher Gewalt).                                                      | <input type="radio"/> |
| <input type="radio"/> | Ich kann meiner Fantasie freien Lauf lassen und mich kreativ ausdrücken (z.B. durch Kunst, Literatur, Musik, usw.).                | <input type="radio"/> |

Stellen Sie sich bitte vor, Sie müssten zwischen den folgenden sechs Optionen wählen, basierend auf den für Sie persönlich wichtigsten und unwichtigsten Aspekten in Ihrem Leben.  
Bitte wählen Sie jeweils die wichtigste bzw. unwichtigste Option.

(10 of 16)

| Am Wichtigsten        |                                                                                                                                                                                                                                       | Am Unwichtigsten      |
|-----------------------|---------------------------------------------------------------------------------------------------------------------------------------------------------------------------------------------------------------------------------------|-----------------------|
| <input type="radio"/> | Ich kann die Menschen in meiner Umgebung respektieren, wertschätzen und würdigen.                                                                                                                                                     | <input type="radio"/> |
| <input type="radio"/> | Ich kann Freunde oder Verwandte in geselligem Rahmen treffen.                                                                                                                                                                         | <input type="radio"/> |
| <input type="radio"/> | Ich kann meiner Fantasie freien Lauf lassen und mich kreativ ausdrücken (z.B. durch Kunst, Literatur, Musik, usw.).                                                                                                                   | <input type="radio"/> |
| <input type="radio"/> | Ich kann selbst frei entscheiden, wie ich mein Leben lebe.                                                                                                                                                                            | <input type="radio"/> |
| <input type="radio"/> | Ich werde nicht diskriminiert (aus den folgenden Gründen: Volkszugehörigkeit/ethnische Zugehörigkeit, Geschlecht, Religion, sexuelle Orientierung, Alter, Gesundheitszustand oder Behinderung - einschließlich geistiger Gesundheit). | <input type="radio"/> |
| <input type="radio"/> | Ich kann meine Ansichten frei äußern, auch meine politischen und religiösen Ansichten.                                                                                                                                                | <input type="radio"/> |

Stellen Sie sich bitte vor, Sie müssten zwischen den folgenden sechs Optionen wählen, basierend auf den für Sie persönlich wichtigsten und unwichtigsten Aspekten in Ihrem Leben.  
Bitte wählen Sie jeweils die wichtigste bzw. unwichtigste Option.

(11 of 16)

| Am Wichtigsten        |                                                                                                                                    | Am Unwichtigsten      |
|-----------------------|------------------------------------------------------------------------------------------------------------------------------------|-----------------------|
| <input type="radio"/> | Ich kann meine Ansichten frei äußern, auch meine politischen und religiösen Ansichten.                                             | <input type="radio"/> |
| <input type="radio"/> | Ich kann die Menschen in meiner Umgebung respektieren, wertschätzen und würdigen.                                                  | <input type="radio"/> |
| <input type="radio"/> | Ich kann Freunde oder Verwandte in geselligem Rahmen treffen.                                                                      | <input type="radio"/> |
| <input type="radio"/> | Ich schlafe nicht weniger, weil ich mir Sorgen mache.                                                                              | <input type="radio"/> |
| <input type="radio"/> | Mein Gesundheitszustand, verglichen mit gleichaltrigen Menschen, schränkt mich in meinen Alltagsaktivitäten in keinsten Weise ein. | <input type="radio"/> |
| <input type="radio"/> | Ich kann Entscheidungen beeinflussen, die sich auf mein Wohngebiet auswirken.                                                      | <input type="radio"/> |

Stellen Sie sich bitte vor, Sie müssten zwischen den folgenden sechs Optionen wählen, basierend auf den für Sie persönlich wichtigsten und unwichtigsten Aspekten in Ihrem Leben.  
Bitte wählen Sie jeweils die wichtigste bzw. unwichtigste Option.

(12 of 16)

| Am Wichtigsten        |                                                                                                                        | Am Unwichtigsten      |
|-----------------------|------------------------------------------------------------------------------------------------------------------------|-----------------------|
| <input type="radio"/> | Ich kann Pflanzen, Tiere und die Natur würdigen und wertschätzen.                                                      | <input type="radio"/> |
| <input type="radio"/> | Ich kann Entscheidungen beeinflussen, die sich auf mein Wohngebiet auswirken.                                          | <input type="radio"/> |
| <input type="radio"/> | Ich schlafe nicht weniger, weil ich mir Sorgen mache.                                                                  | <input type="radio"/> |
| <input type="radio"/> | Ich habe Zugang zu interessanten Aktivitäten (oder Erwerbstätigkeit).                                                  | <input type="radio"/> |
| <input type="radio"/> | Mir fällt es leicht, die Liebe, Fürsorge und Unterstützung meiner Familie und/oder Freunde anzunehmen und zu genießen. | <input type="radio"/> |
| <input type="radio"/> | Ich kann meine Freizeitaktivitäten genießen.                                                                           | <input type="radio"/> |



Stellen Sie sich bitte vor, Sie müssten zwischen den folgenden sechs Optionen wählen, basierend auf den für Sie persönlich wichtigsten und unwichtigsten Aspekten in Ihrem Leben.  
Bitte wählen Sie jeweils die wichtigste bzw. unwichtigste Option.

(13 of 16)

| Am Wichtigsten        |                                                                                        | Am Unwichtigsten      |
|-----------------------|----------------------------------------------------------------------------------------|-----------------------|
| <input type="radio"/> | Ich kann Entscheidungen beeinflussen, die sich auf mein Wohngebiet auswirken.          | <input type="radio"/> |
| <input type="radio"/> | Ich kann meine Ansichten frei äußern, auch meine politischen und religiösen Ansichten. | <input type="radio"/> |
| <input type="radio"/> | Ich kann Pflanzen, Tiere und die Natur würdigen und wertschätzen.                      | <input type="radio"/> |
| <input type="radio"/> | Ich kann die Menschen in meiner Umgebung respektieren, wertschätzen und würdigen.      | <input type="radio"/> |
| <input type="radio"/> | Ich werde nicht angegriffen (einschließlich sexueller und häuslicher Gewalt).          | <input type="radio"/> |
| <input type="radio"/> | Meine Wohnsituation ist für meine Bedürfnisse geeignet.                                | <input type="radio"/> |

Stellen Sie sich bitte vor, Sie müssten zwischen den folgenden sechs Optionen wählen, basierend auf den für Sie persönlich wichtigsten und unwichtigsten Aspekten in Ihrem Leben.  
Bitte wählen Sie jeweils die wichtigste bzw. unwichtigste Option.

(14 of 16)

| Am Wichtigsten        |                                                                               | Am Unwichtigsten      |
|-----------------------|-------------------------------------------------------------------------------|-----------------------|
| <input type="radio"/> | Ich kann selbst frei entscheiden, wie ich mein Leben lebe.                    | <input type="radio"/> |
| <input type="radio"/> | Ich kann Freunde oder Verwandte in geselligem Rahmen treffen.                 | <input type="radio"/> |
| <input type="radio"/> | Ich habe Zugang zu interessanten Aktivitäten (oder Erwerbstätigkeit).         | <input type="radio"/> |
| <input type="radio"/> | Ich werde nicht angegriffen (einschließlich sexueller und häuslicher Gewalt). | <input type="radio"/> |
| <input type="radio"/> | Ich schlafe nicht weniger, weil ich mir Sorgen mache.                         | <input type="radio"/> |
| <input type="radio"/> | Ich kann meine Freizeitaktivitäten genießen.                                  | <input type="radio"/> |



Stellen Sie sich bitte vor, Sie müssten zwischen den folgenden sechs Optionen wählen, basierend auf den für Sie persönlich wichtigsten und unwichtigsten Aspekten in Ihrem Leben.  
Bitte wählen Sie jeweils die wichtigste bzw. unwichtigste Option.

(15 of 16)

| Am Wichtigsten        |                                                                                                                                    | Am Unwichtigsten      |
|-----------------------|------------------------------------------------------------------------------------------------------------------------------------|-----------------------|
| <input type="radio"/> | Ich kann Freunde oder Verwandte in geselligem Rahmen treffen.                                                                      | <input type="radio"/> |
| <input type="radio"/> | Ich kann Pflanzen, Tiere und die Natur würdigen und wertschätzen.                                                                  | <input type="radio"/> |
| <input type="radio"/> | Ich fühle mich sicher, wenn ich allein in der Nähe meiner Wohnung zu Fuß unterwegs bin.                                            | <input type="radio"/> |
| <input type="radio"/> | Ich kann Entscheidungen beeinflussen, die sich auf mein Wohngebiet auswirken.                                                      | <input type="radio"/> |
| <input type="radio"/> | Ich kann selbst frei entscheiden, wie ich mein Leben lebe.                                                                         | <input type="radio"/> |
| <input type="radio"/> | Mein Gesundheitszustand, verglichen mit gleichaltrigen Menschen, schränkt mich in meinen Alltagsaktivitäten in keinsten Weise ein. | <input type="radio"/> |

Stellen Sie sich bitte vor, Sie müssten zwischen den folgenden sechs Optionen wählen, basierend auf den für Sie persönlich wichtigsten und unwichtigsten Aspekten in Ihrem Leben.  
Bitte wählen Sie jeweils die wichtigste bzw. unwichtigste Option.

(16 of 16)

| Am Wichtigsten        |                                                                                                                                                                                                                                       | Am Unwichtigsten      |
|-----------------------|---------------------------------------------------------------------------------------------------------------------------------------------------------------------------------------------------------------------------------------|-----------------------|
| <input type="radio"/> | Ich kann meine Freizeitaktivitäten genießen.                                                                                                                                                                                          | <input type="radio"/> |
| <input type="radio"/> | Ich werde nicht diskriminiert (aus den folgenden Gründen: Volkszugehörigkeit/ethnische Zugehörigkeit, Geschlecht, Religion, sexuelle Orientierung, Alter, Gesundheitszustand oder Behinderung - einschließlich geistiger Gesundheit). | <input type="radio"/> |
| <input type="radio"/> | Meine Wohnsituation ist für meine Bedürfnisse geeignet.                                                                                                                                                                               | <input type="radio"/> |
| <input type="radio"/> | Ich kann Freunde oder Verwandte in geselligem Rahmen treffen.                                                                                                                                                                         | <input type="radio"/> |
| <input type="radio"/> | Ich kann Entscheidungen beeinflussen, die sich auf mein Wohngebiet auswirken.                                                                                                                                                         | <input type="radio"/> |
| <input type="radio"/> | Mir fällt es leicht, die Liebe, Fürsorge und Unterstützung meiner Familie und/oder Freunde anzunehmen und zu genießen.                                                                                                                | <input type="radio"/> |

Vielen Dank für das Ausfüllen dieses Fragebogens!
